# Supplementary material for: Clinical Efficacy of Novel Patient-Covering Negative-Pressure Box for Shielding Virus Transmission during Esophagogastroduodenoscopy: A Prospective Observational Study
Source: MDPI journal article supplement (doi:10.3390/diagnostics11091679), 2021-09-14

Figure S1. To minimize the influence of environmental factors on the aerosol readings, a cutoff value of increased particles was configured by performing 10 particle measurements in the setting without EGD. The mean cutoff value  $\pm$  2SD of an increased ratio of 0.3- and 0.5- $\mu\text{m}$  particles was  $3.96 \pm 14.41$  and  $-0.14 \pm 16.92$ , respectively. Based on these data, increased aerosols were defined as an aerosol reading of more than the cutoff value for each size of particles. EGD = esophagogastrroduodenoscopy; SD = standard deviation.

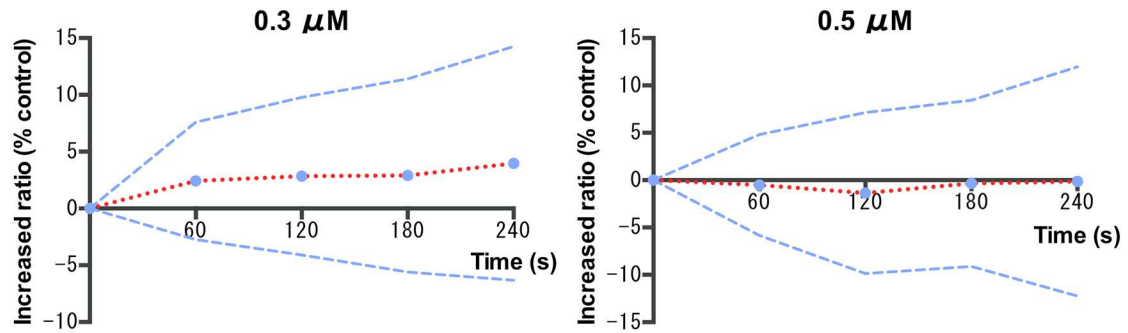

Supplement: s1 [file s1]
